# Supplementary material for: Early Progressive Changes in White Matter Integrity Are Associated with Stroke Recovery
Source: PubMed Central journal article supplement (PMC7575507; doi:10.1007/s12975-020-00797-x), 2020-03-04
Supplement: 12975_2020_797_MOESM1_ESM.pdf [file 12975_2020_797_MOESM1_ESM.pdf]

## **Early progressive changes in white matter integrity are associated with stroke recovery**

### **Translational Stroke Research**

Daniela Pinter (PhD)<sup>1,2</sup>; Thomas Gatteringer (MD, PhD)<sup>2,3</sup>; Simon Fandler-Höfler (MD)<sup>2</sup>; Markus Kneihsl (MD)<sup>2</sup>; Sebastian Eppinger (MD)<sup>2</sup>; Hannes Deutschmann (MD)<sup>3</sup>; Alexander Pichler (MD)<sup>2</sup>; Birgit Poltrum (MD)<sup>2</sup>; Gernot Reishofer (PhD)<sup>3</sup>; Stefan Ropele (PhD)<sup>2</sup>; Reinhold Schmidt (MD)<sup>2</sup>; and Christian Enzinger (MD)<sup>1,2,3</sup>

1 Department of Neurology, Research Unit for Neuronal Plasticity and Repair, Medical University of Graz, Graz, Austria

2 Department of Neurology, Medical University of Graz, Graz, Austria

3 Department of Radiology, Division of Neuroradiology, Vascular and Interventional Radiology, Medical University of Graz, Graz, Austria

Corresponding author: Daniela Pinter, PhD, Department of Neurology, Research Unit for Neuronal Plasticity and Repair, Medical University of Graz, Auenbruggerplatz 22, 8036 Graz, Austria, Phone: 0043 316 385 31215, Email: [daniela.pinter@medunigraz.at](mailto:daniela.pinter@medunigraz.at); ORCID: 0000-0003-3138-5225

**Table S1. Baseline and Follow-Up comparison of FA, MD, AD and RD values (Median, IQR) extracted from region of interest in patients vs controls.** CC = corpus callosum, LCST = left corticospinal tract, RCST = right corticospinal tract. Mann-Whitney U Test. Bonferroni-adjusted level of significance = 0.01.

| <b>Baseline FA values</b>  | <b>Patients</b>   | <b>Controls</b>   | <b>p-value</b> |
|----------------------------|-------------------|-------------------|----------------|
| CC genu                    | 0.697 (0.058)     | 0.700 (0.041)     | 0.279          |
| CC body                    | 0.690 (0.052)     | 0.707 (0.040)     | 0.077          |
| CC splenium                | 0.786 (0.038)     | 0.794 (0.019)     | 0.293          |
| LCST                       | 0.594 (0.037)     | 0.593 (0.027)     | 0.380          |
| RCST                       | 0.594 (0.034)     | 0.600 (0.031)     | 0.885          |
| <b>Baseline MD values</b>  | <b>Patients</b>   | <b>Controls</b>   | <b>p-value</b> |
| CC genu                    | 0.00078 (0.00008) | 0.00077 (0.00005) | 0.173          |
| CC body                    | 0.00081 (0.00007) | 0.00079 (0.00005) | 0.030          |
| CC splenium                | 0.00070 (0.00005) | 0.00069 (0.00002) | 0.150          |
| LCST                       | 0.00071 (0.00004) | 0.00070 (0.00002) | 0.992          |
| RCST                       | 0.00070 (0.00005) | 0.00070 (0.00002) | 0.961          |
| <b>Baseline AD values</b>  | <b>Patients</b>   | <b>Controls</b>   | <b>p-value</b> |
| CC genu                    | 0.00155 (0.00011) | 0.00154 (0.00007) | 0.267          |
| CC body                    | 0.00162 (0.00009) | 0.00159 (0.00005) | 0.206          |
| CC splenium                | 0.00156 (0.00007) | 0.00154 (0.00007) | 0.267          |
| LCST                       | 0.00123 (0.00007) | 0.00124 (0.00006) | 0.302          |
| RCST                       | 0.00124 (0.00009) | 0.00124 (0.00006) | 0.900          |
| <b>Baseline RD values</b>  | <b>Patients</b>   | <b>Controls</b>   | <b>p-value</b> |
| CC genu                    | 0.00041 (0.00009) | 0.00039 (0.00004) | 0.186          |
| CC body                    | 0.00042 (0.00007) | 0.00038 (0.00004) | 0.026          |
| CC splenium                | 0.00029 (0.00005) | 0.00028 (0.00002) | 0.206          |
| LCST                       | 0.00044 (0.00004) | 0.00043 (0.00003) | 0.678          |
| RCST                       | 0.00043 (0.00004) | 0.00042 (0.00003) | 0.595          |
| <b>Follow-Up FA values</b> | <b>Patients</b>   | <b>Controls</b>   | <b>p-value</b> |
| CC genu                    | 0.671 (0.056)     | 0.707 (0.034)     | 0.028          |
| CC body                    | 0.682 (0.039)     | 0.721 (0.028)     | <b>0.001</b>   |
| CC splenium                | 0.789 (0.027)     | 0.791 (0.021)     | 0.738          |

|                            |                   |                   |                   |
|----------------------------|-------------------|-------------------|-------------------|
| LCST                       | 0.576 (0.036)     | 0.596 (0.018)     | 0.055             |
| RCST                       | 0.592 (0.025)     | 0.599 (0.019)     | 0.361             |
| <b>Follow-Up MD values</b> | <b>Patients</b>   | <b>Controls</b>   | <b>p-value</b>    |
| CC genu                    | 0.00084 (0.00017) | 0.00079 (0.00006) | <b>0.001</b>      |
| CC body                    | 0.00086 (0.00020) | 0.00078 (0.00005) | <b>0.001</b>      |
| CC splenium                | 0.00076 (0.00026) | 0.00069 (0.00003) | <b>0.003</b>      |
| LCST                       | 0.00074 (0.00078) | 0.00071 (0.00002) | <b>0.002</b>      |
| RCST                       | 0.00075 (0.00018) | 0.00070 (0.00002) | 0.012             |
| <b>Follow-Up AD values</b> | <b>Patients</b>   | <b>Controls</b>   | <b>p-value</b>    |
| CC genu                    | 0.00158 (0.00008) | 0.00155 (0.00008) | 0.067             |
| CC body                    | 0.00163 (0.00011) | 0.00160 (0.00005) | 0.060             |
| CC splenium                | 0.00158 (0.00012) | 0.00155 (0.00006) | 0.064             |
| LCST                       | 0.00124 (0.00012) | 0.00125 (0.00005) | 0.485             |
| RCST                       | 0.00126 (0.00008) | 0.00123 (0.00005) | 0.112             |
| <b>Follow-Up RD values</b> | <b>Patients</b>   | <b>Controls</b>   | <b>p-value</b>    |
| CC genu                    | 0.00048 (0.00023) | 0.00037 (0.00004) | <b>&lt;0.0001</b> |
| CC body                    | 0.00047 (0.00029) | 0.00038 (0.00005) | <b>0.001</b>      |
| CC splenium                | 0.00035 (0.00032) | 0.00028 (0.00002) | <b>0.002</b>      |
| LCST                       | 0.00051 (0.00013) | 0.00044 (0.00003) | <b>0.001</b>      |
| RCST                       | 0.00050 (0.00025) | 0.00042 (0.00003) | <b>0.008</b>      |

**Table S2: Correlations of cross-sectional extracted white matter integrity and stroke recovery (delta NIHSS). LCST = left corticospinal tract, RCST = right corticospinal tract; CC = corpus callosum. Level of significance after Bonferroni correction = 0.01.**

| <b>Baseline FA</b>  | <b>Stroke recovery</b> | <b>p-value</b> |
|---------------------|------------------------|----------------|
| LCST                | -0.135                 | 0.426          |
| RCST                | 0.048                  | 0.776          |
| CC genu             | 0.404                  | <b>0.013</b>   |
| CC body             | 0.204                  | 0.226          |
| CC splenium         | 0.194                  | 0.250          |
| <b>Follow-Up FA</b> |                        |                |
| LCST                | -0.164                 | 0.386          |
| RCST                | -0.136                 | 0.473          |
| CC genu             | -0.117                 | 0.538          |
| CC body             | -0.012                 | 0.950          |
| CC splenium         | 0.176                  | 0.352          |
| <b>FA change</b>    |                        |                |
| LCST                | -0.085                 | 0.654          |
| RCST                | -0.186                 | 0.326          |
| CC genu             | -0.390                 | <b>0.033</b>   |
| CC body             | -0.241                 | 0.199          |
| CC splenium         | -0.019                 | 0.922          |
| <b>Baseline MD</b>  | <b>Stroke recovery</b> | <b>p-value</b> |
| LCST                | -0.056                 | 0.744          |
| RCST                | -0.104                 | 0.540          |
| CC genu             | -0.337                 | <b>0.041</b>   |
| CC body             | -0.167                 | 0.323          |
| CC splenium         | -0.199                 | 0.237          |
| <b>Follow-Up MD</b> |                        |                |
| LCST                | -0.073                 | 0.701          |
| RCST                | 0.121                  | 0.523          |
| CC genu             | 0.002                  | 0.993          |
| CC body             | 0.136                  | 0.474          |
| CC splenium         | 0.030                  | 0.874          |

| <b>MD change</b>    |                        |                |
|---------------------|------------------------|----------------|
| LCST                | 0.035                  | 0.856          |
| RCST                | 0.125                  | 0.511          |
| CC genu             | 0.214                  | 0.256          |
| CC body             | 0.206                  | 0.275          |
| CC splenium         | 0.127                  | 0.502          |
| <b>Baseline AD</b>  | <b>Stroke recovery</b> | <b>p-value</b> |
| LCST                | -0.059                 | 0.728          |
| RCST                | -0.174                 | 0.304          |
| CC genu             | -0.065                 | 0.702          |
| CC body             | -0.062                 | 0.716          |
| CC splenium         | -0.224                 | 0.183          |
| <b>Follow-Up AD</b> |                        |                |
| LCST                | -0.235                 | 0.212          |
| RCST                | 0.036                  | 0.868          |
| CC genu             | 0.089                  | 0.639          |
| CC body             | 0.053                  | 0.782          |
| CC splenium         | 0.029                  | 0.877          |
| <b>AD change</b>    |                        |                |
| LCST                | -0.304                 | 0.102          |
| RCST                | 0.184                  | 0.331          |
| CC genu             | -0.001                 | 0.994          |
| CC body             | -0.017                 | 0.929          |
| CC splenium         | 0.104                  | 0.584          |
| <b>Baseline RD</b>  | <b>Stroke recovery</b> | <b>p-value</b> |
| LCST                | 0.079                  | 0.641          |
| RCST                | -0.121                 | 0.474          |
| CC genu             | -0.381                 | <b>0.020</b>   |
| CC body             | -0.218                 | 0.195          |
| CC splenium         | -0.208                 | 0.216          |
| <b>Follow-Up RD</b> |                        |                |
| LCST                | 0.124                  | 0.513          |
| RCST                | 0.110                  | 0.562          |

|                  |       |       |
|------------------|-------|-------|
| CC genu          | 0.007 | 0.969 |
| CC body          | 0.122 | 0.522 |
| CC splenium      | 0.064 | 0.738 |
| <b>RD change</b> |       |       |
| LCST             | 0.108 | 0.571 |
| RCST             | 0.137 | 0.471 |
| CC genu          | 0.208 | 0.271 |
| CC body          | 0.244 | 0.193 |
| CC splenium      | 0.106 | 0.579 |
